# Supplementary material
Source: HighWire-hosted journal article supplement (https://bmjopen.bmj.com/content/12/5/e051873)
Supplement: inline-supplementary-material-1 [file inline-supplementary-material-1.pdf]

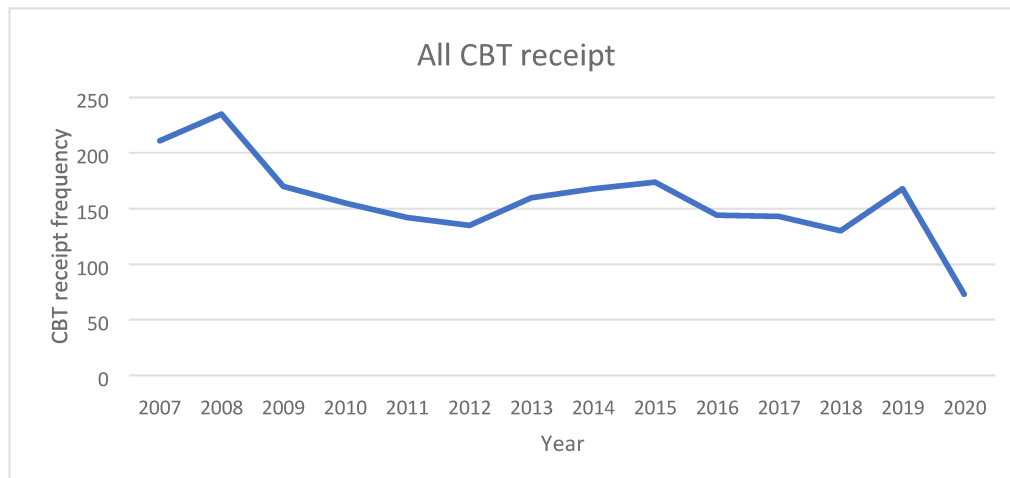

Supplementary figure

*Graph demonstrating the frequency of general CBT receipt (CBT receipt prior to diagnosis and recorded CBTp receipt post diagnosis) per year of extraction period.*
